# Supplementary figures and images for: Spectral library transfer between distinct laser-induced breakdown spectroscopy systems trained on simultaneous measurements
Source: Royal Society of Chemistry journal article supplement (doi:10.1039/d2ja00406b), 2023-01-01

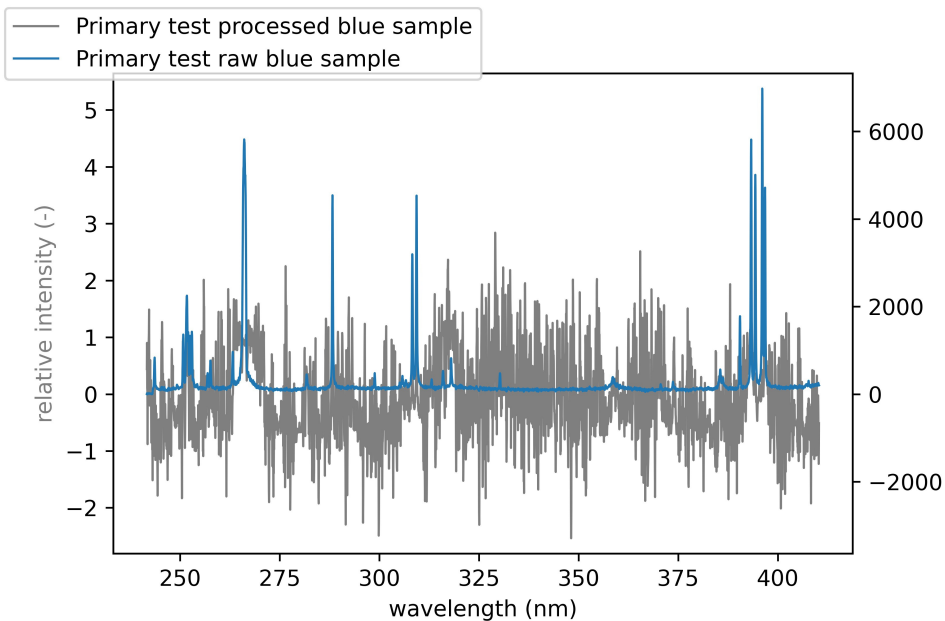

Supplement: d2ja00406b1.pdf [file d2ja00406b1.pdf]

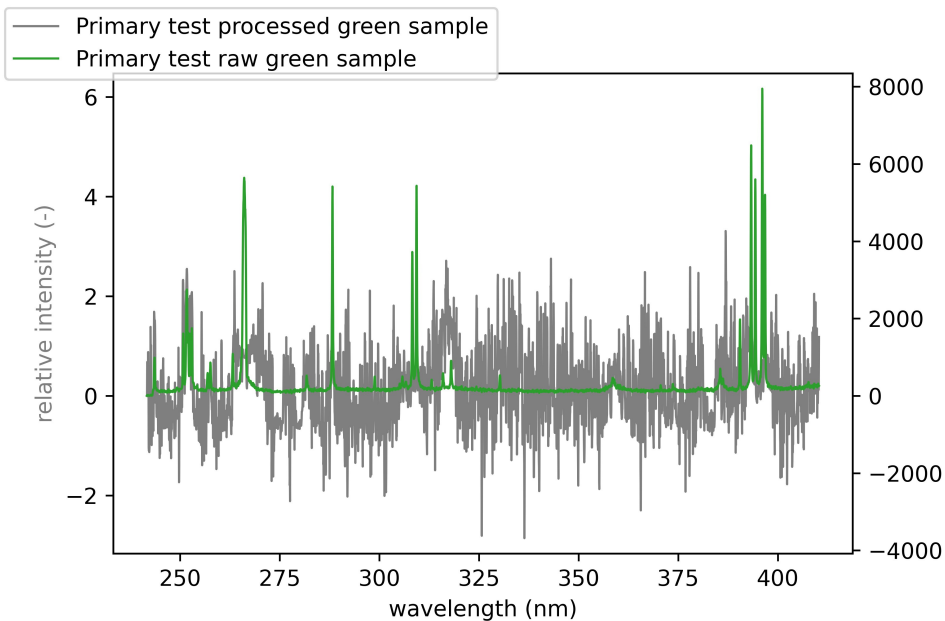

Supplement: d2ja00406b2.pdf [file d2ja00406b2.pdf]

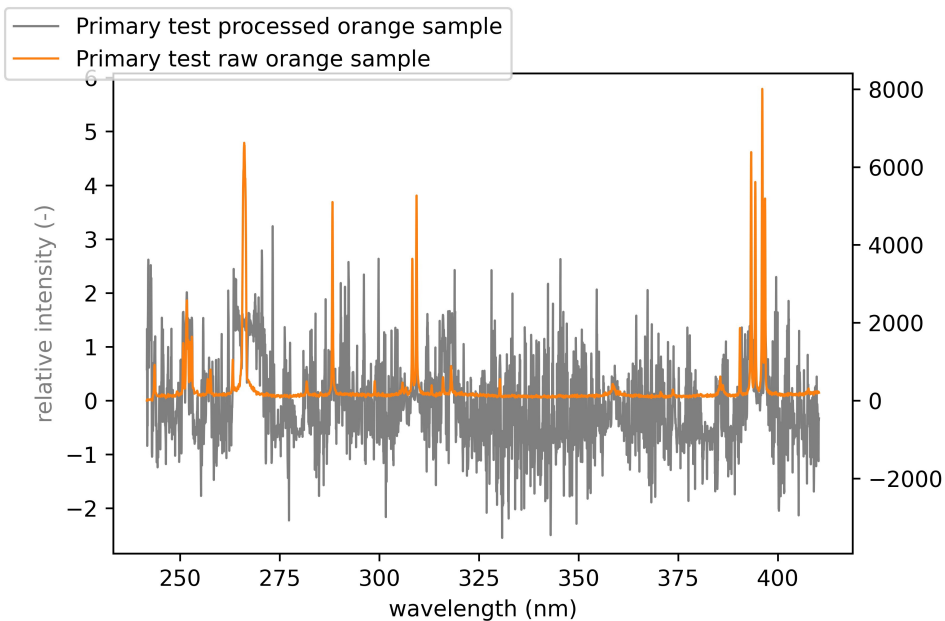

Supplement: d2ja00406b3.pdf [file d2ja00406b3.pdf]

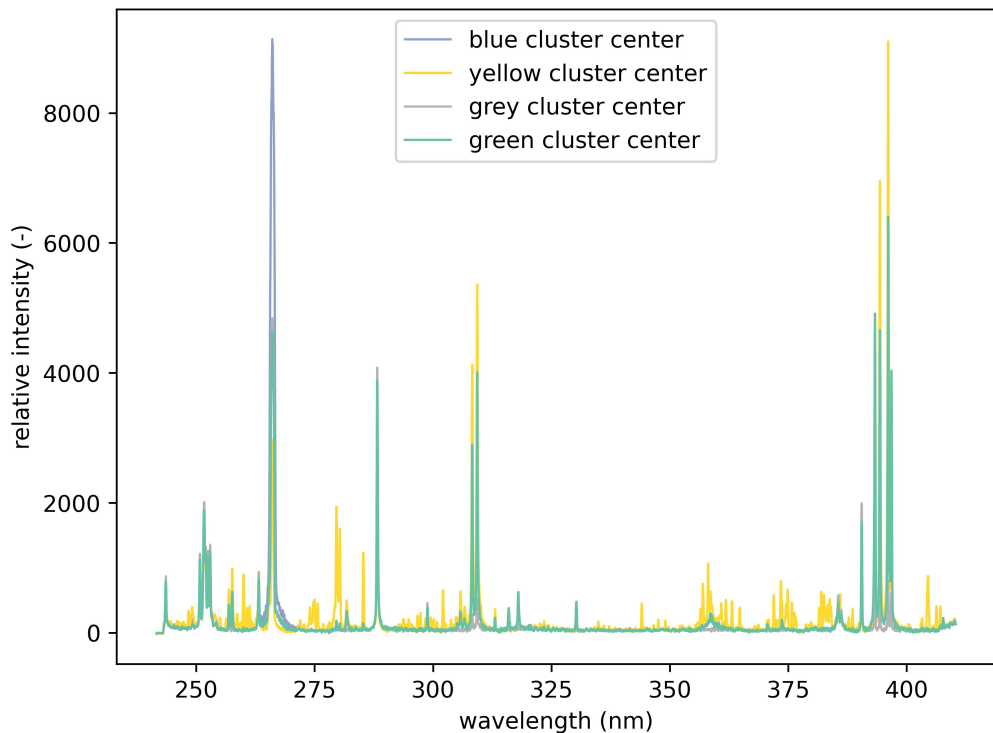

Supplement: d2ja00406b4.pdf [file d2ja00406b4.pdf]

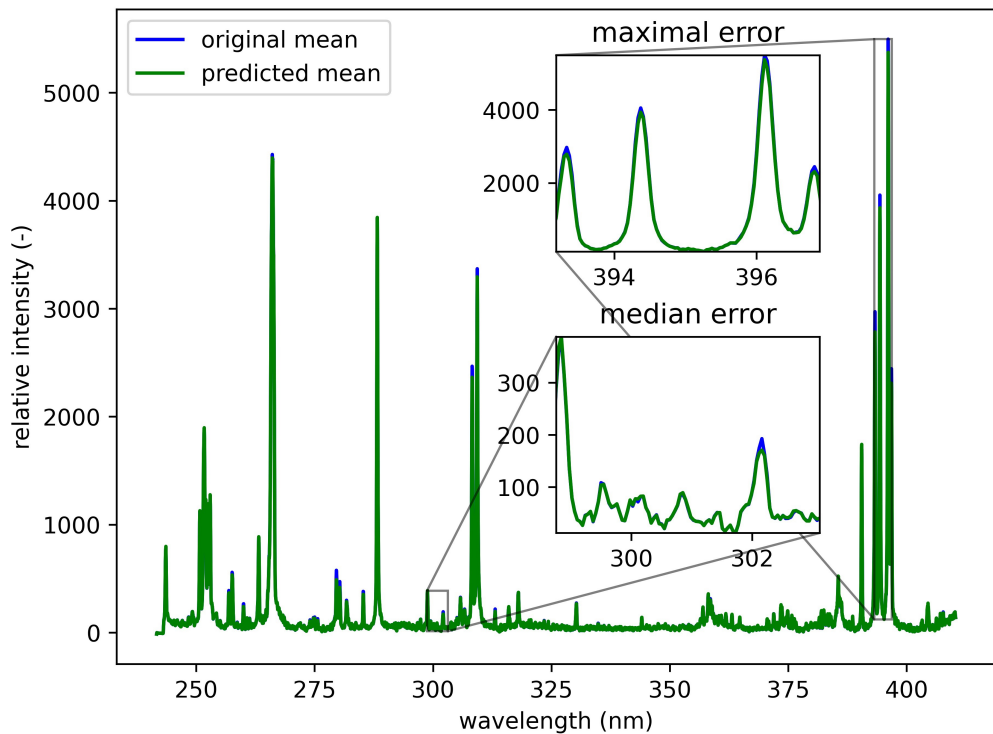

Supplement: d2ja00406b5.pdf [file d2ja00406b5.pdf]
